# Supplementary material for: Enhanced neutrophil extracellular trap generation in rheumatoid arthritis: analysis of underlying signal transduction pathways and potential diagnostic utility
Source: PubMed Central journal article supplement (PMC4229860; doi:10.1186/ar4579), 2014-06-13
Supplement: ar4579-S3.pdf [file ar4579-S3.pdf]

### Additional Figure 3

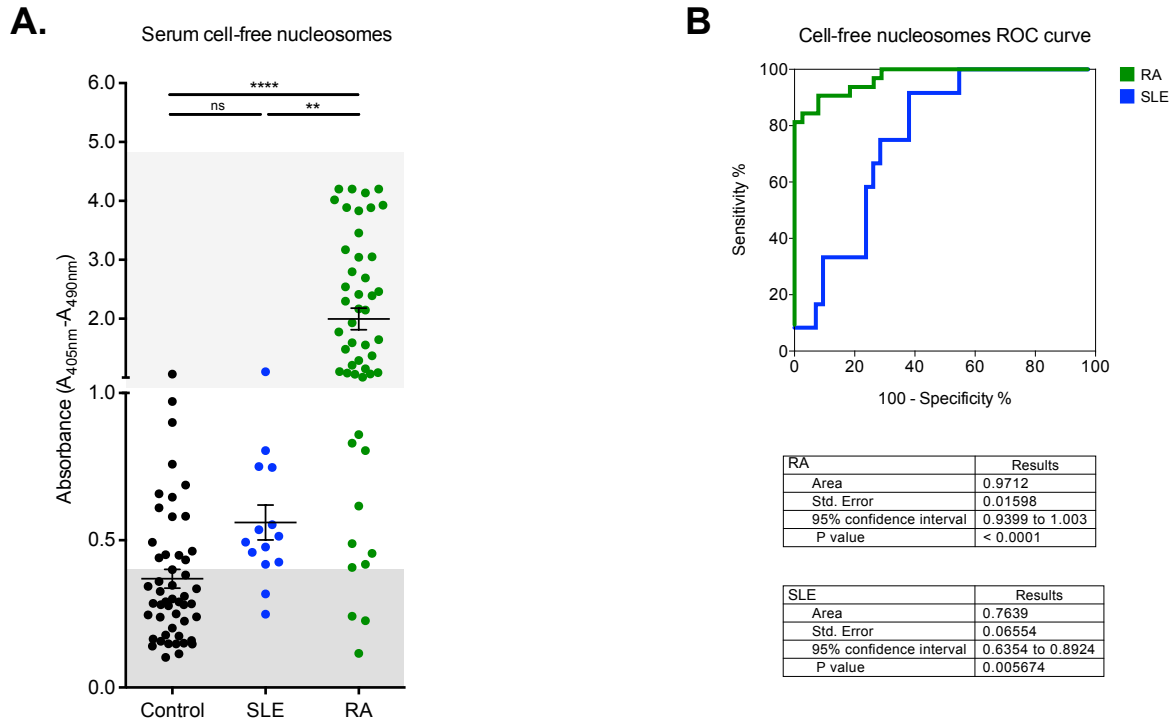

**Additional Figure 3.** Elevated serum levels of NETs components, in RA patients have potential clinical utility. **(A)** Cell-free nucleosome levels in plasma and serum from healthy matched blood donors (n=50), patients with SLE (n=14) and patients with RA (n=39) determined by ELISA. **(B)** ROC analysis of cell-free nucleosomes in serum of patients with RA, patients with SLE and healthy controls. \*\*P < 0.01, \*\*\*\*P < 0.0001, n.s.: statistically not significant, Mann-Whitney U test; PMN: polymorphonuclear leukocytes; PBMC: peripheral blood mononuclear cells.
